# Supplementary material for: Bacterial Rotary Export ATPases Are Allosterically Regulated by the Nucleotide Second Messenger Cyclic-di-GMP
Source: PubMed Central journal article supplement (PMC4591828; doi:10.1074/jbc.m115.661439), 2015-08-11
Supplement: supp_M115.661439_jbc.M115.661439-1.pdf [file supp_M115.661439_jbc.M115.661439-1.pdf]

Bacterial Rotary Export ATPases are Allosterically Regulated by the Nucleotide Second Messenger  
Cyclic-di-GMP

Eleftheria Trampari<sup>1</sup>, Clare E.M. Stevenson<sup>2</sup>, Richard H. Little<sup>1</sup>, Thomas Wilhelm<sup>3</sup>, David M.  
Lawson<sup>2</sup> and Jacob G. Malone<sup>1,4,\*</sup>

**SUPPLEMENTARY FIGURE**

**Figure S1 (attached .pdf file):** Mass Spectrometry Peak Shift Analyses (MS-PSA) for treated (i.e. cross-linked to cdG) vs untreated FliI<sub>His</sub> (S1A) and treated FliI<sub>His</sub> only (S1B). The particularly dense clusters of related spectra in both analyses correspond to the most densely-modified peptide following cdG-capture compound crosslinking. In both cases, this peptide, (NVLLLMSLTR) comprises residues 259-269 of FliI.
